# Supplementary material for: Designing a Patient Portal for Patient-Centered Care: Cross-Sectional Survey
Source: PubMed Central journal article supplement (PMC6231862; doi:10.2196/jmir.9497), 2018-10-01
Supplement: jmir_v20i10e269_app5.pdf [file jmir_v20i10e269_app5.pdf]

## Multimedia Appendix 5: predictor variables: Demographic variables, patient-empowerment variables and health literacy variables

| Predictors                                 | Variable choices                   | Condensed values                  |
|--------------------------------------------|------------------------------------|-----------------------------------|
| <b>Age</b>                                 | Free entry                         | 18 - 34 years                     |
|                                            |                                    | 35 - 44 years                     |
|                                            |                                    | 45 - 54 years                     |
|                                            |                                    | 55 - 64 years                     |
|                                            |                                    | 65 and older (65+)                |
| <b>Employment Status</b>                   | Employed full of part time         | Working                           |
|                                            | Self - employed                    | Student                           |
|                                            | Full time student                  | Not working                       |
|                                            | Homemaker                          | Retired                           |
|                                            | Disabled and not working           |                                   |
|                                            | Curently unemployed, not working   |                                   |
|                                            | Retired                            |                                   |
| <b>Family income</b>                       | Under 20 000 €                     | <30 000 €                         |
|                                            | 20 000 - 30 000 €                  | 30 000 - 60 000 €                 |
|                                            | 30 000 - 40 000 €                  | >60 000 €                         |
|                                            | 40 000 - 60 000 €                  | Don't know / don't wish to answer |
|                                            | 60 000 - 80 000 €                  |                                   |
|                                            | Above 80 000 €                     |                                   |
|                                            | Don't know                         |                                   |
|                                            | Don't wish to answer this question |                                   |
| <b>Health status</b>                       | Excellent                          | Excellent                         |
|                                            | Very good                          | Good/fair                         |
|                                            | Good                               | Poor                              |
|                                            | Fair                               |                                   |
|                                            | Poor                               |                                   |
| <b>Education</b>                           | Primary school                     | Highschool or lower               |
|                                            | High school                        | Bachelor degree                   |
|                                            | Bachelor degree                    | Master degree or higher           |
|                                            | Master degree or higher            |                                   |
| <b>Gender</b>                              | Male                               | Male                              |
|                                            | Female                             | female                            |
| <b>Shared decision making <sup>a</sup></b> | Strongly agree                     | Agree                             |
|                                            | Agree                              | Neutral                           |

|                                                                      |                          |                         |
|----------------------------------------------------------------------|--------------------------|-------------------------|
|                                                                      | Neutral                  | Disagree                |
|                                                                      | Disagree                 |                         |
|                                                                      | Strongly disagree        |                         |
|                                                                      |                          |                         |
| <b>Questioning the decisions of physicians <sup>a</sup></b>          | Very important           | Important               |
|                                                                      | Important                | Neutral                 |
|                                                                      | Not very important       | Not important           |
|                                                                      | Unimportant              |                         |
|                                                                      | Very unimportant         |                         |
|                                                                      |                          |                         |
| <b>Satisfaction with healthcare last 5 years <sup>a</sup></b>        | Very satisfied           | Satisfied               |
|                                                                      | Somewhat satisfied       | Neutral                 |
|                                                                      | Neutral                  | Dissatisfied            |
|                                                                      | Somewhat dissatisfied    |                         |
|                                                                      | Very dissatisfied        |                         |
|                                                                      |                          |                         |
| <b>Finding relevant health information <sup>b</sup></b>              | Very difficult           | Difficult               |
|                                                                      | Difficult                | Not easy /not difficult |
|                                                                      | Not easy / not difficult | Easy                    |
|                                                                      | Easy                     |                         |
|                                                                      | Very easy                |                         |
|                                                                      |                          |                         |
| <b>Evaluating the reliability of health information <sup>b</sup></b> | Very difficult           | Difficult               |
|                                                                      | Difficult                | Not easy /not difficult |
|                                                                      | Not easy / not difficult | Easy                    |
|                                                                      | Easy                     |                         |
|                                                                      | Very easy                |                         |
|                                                                      |                          |                         |
| <b>Problems understanding health information <sup>b</sup></b>        | Always                   | Often                   |
|                                                                      | Often                    | Sometimes               |
|                                                                      | Sometimes                | Rarely                  |
|                                                                      | Occasionally             |                         |
|                                                                      | Never                    |                         |

a) Used as variables for patient-empowerment

b) Used as variables for health literacy
