# Supplementary material for: Designing a Patient Portal for Patient-Centered Care: Cross-Sectional Survey
Source: J Med Internet Res. 2018 Oct 1;20(10):e269. doi: 10.2196/jmir.9497 (PMC6231862; doi:10.2196/jmir.9497)
Supplement: Multimedia Appendix 1 [file jmir_v20i10e269_app1.pdf]

## Multimedia Appendix 1: Survey part 1 and part 2.

### Part 1 of the survey:

**Questions 1-9:** These questions ask about your health and use of healthcare services.

1) In general, how would you rate your overall health?

|                       |                       |                       |                       |                       |
|-----------------------|-----------------------|-----------------------|-----------------------|-----------------------|
| <input type="radio"/> |
| Excellent             | Very good             | Good                  | Fair                  | Poor                  |

2) Are you being treated for any ongoing, persistent, or intermittent disease or medical condition such as high blood pressure, diabetes, heart or lung disease, mental health problem, or arthritis?

☐ Yes  
☐ No

3) Are you taking any medication(s) prescribed by a doctor?

☐ Yes  
☐ No

4) How many visits in the **past year** have you had with the following healthcare providers or facilities?

|                                                                                      | None                  | 1                     | 2-3                   | More than 3           |
|--------------------------------------------------------------------------------------|-----------------------|-----------------------|-----------------------|-----------------------|
| a) Primary Care Provider (including doctors and nurse practitioners)                 | <input type="radio"/> | <input type="radio"/> | <input type="radio"/> | <input type="radio"/> |
| b) Specialist (gynecologist, heart doctor, skin doctor, lung doctor, allergist, etc) | <input type="radio"/> | <input type="radio"/> | <input type="radio"/> | <input type="radio"/> |
| c) Emergency Department                                                              | <input type="radio"/> | <input type="radio"/> | <input type="radio"/> | <input type="radio"/> |
| d) Hospital (stayed at least overnight)                                              | <input type="radio"/> | <input type="radio"/> | <input type="radio"/> | <input type="radio"/> |

5) Overall, how satisfied are you with the quality of health care service you have received in the past **5 years**?

|                       |                       |                       |                       |                       |
|-----------------------|-----------------------|-----------------------|-----------------------|-----------------------|
| <input type="radio"/> |
| Very satisfied        | Somewhat satisfied    | Neutral               | Somewhat dissatisfied | Very dissatisfied     |

6) How often do you have problems understanding your doctors when they are talking to you about your health?

|                       |                       |                       |                       |                       |
|-----------------------|-----------------------|-----------------------|-----------------------|-----------------------|
| <input type="radio"/> |
| Always                | Often                 | Sometimes             | Occasionally          | Never                 |

7) How often do you have problems understanding written medical information (such as forms, written instructions, or pamphlets) from your doctor or your doctor's office?

|                       |                       |                       |                       |                       |
|-----------------------|-----------------------|-----------------------|-----------------------|-----------------------|
| <input type="radio"/> |
| Always                | Often                 | Sometimes             | Occasionally          | Never                 |

8) Which of the following **best** describes the way you make decisions about your medical care? Please choose one:

☐ My doctor(s) gives recommendations, but I make my own decisions about my medical care  
☐ My doctor(s) and I make decisions about my medical care together as a team  
☐ I leave it up to my doctor(s) to make the best decisions about my medical care

9) Are you currently caring for or making healthcare decisions for a family member or a close friend with a debilitating or chronic illness?

☐ Yes  
☐ No

**Questions 10-14:** These questions ask about use of computers and the Internet.

10) Do you have a computer with Internet access available for use, either at home or work?

- ☐ Yes
- ☐ No

11) How often do you access the Internet?

- |                       |                       |                       |                       |                       |
|-----------------------|-----------------------|-----------------------|-----------------------|-----------------------|
| <input type="radio"/> |
| Several times a day   | About once a day      | Once weekly           | Once monthly          | Rarely or not at all  |

12) What is your primary source of information for issues in your community?

- ☐ Newspaper
- ☐ Television
- ☐ Radio
- ☐ Internet

13) Which of the following activities have you done on the Internet? Please check all that apply:

- ☐ Sent and received e-mails
- ☐ Purchased something online with a credit card
- ☐ Paid bills and/or managed bank accounts online
- ☐ Looked up information on health and diseases

14) Do any of your doctors or healthcare providers currently use a computer to store and access your medical record?

- ☐ Yes
- ☐ No
- ☐ Don't know

**Questions 15-21:** These questions ask about electronic **patient portals**. Unlike an electronic medical record that is primarily used by your healthcare providers, an electronic **patient portal is primarily used by you to view your health information and manage your healthcare (for example, to make appointments) on the Internet.**

15) Please indicate how strongly you agree or disagree with the following statement: I am interested in using a patient portal to view my health information and manage my healthcare.

- |                       |                       |                       |                       |                       |
|-----------------------|-----------------------|-----------------------|-----------------------|-----------------------|
| <input type="radio"/> |
| Strongly agree        | Agree                 | Neutral               | Disagree              | Strongly disagree     |

16) Which of the following types of health information would you like to have as part of your patient portal? Please check all that apply:

- ☐ My allergies
- ☐ Test results (examples: blood tests, X-rays)
- ☐ Immunization records (a record of vaccines you have received)
- ☐ Medications I have taken or am currently taking
- ☐ List of doctors and healthcare providers I have seen
- ☐ Family history of health problems
- ☐ Medical problems
- ☐ Medical visits, surgeries, and medical procedures that I have had
- ☐ Lifestyle choices (example: exercise, smoking history)
- ☐ Information from devices that help me monitor my health (example: glucose from a diabetes meter)

17) For each of the activities below, please indicate if this is an activity you already do, you don't currently do but would like to be able to do, or you do not want to do **on the Internet**:

|                                                                                                                                                                           | I do this on<br>the Internet<br>now | I would like to<br>do this on the<br>Internet | I would <u>not</u><br>do this on the<br>Internet |
|---------------------------------------------------------------------------------------------------------------------------------------------------------------------------|-------------------------------------|-----------------------------------------------|--------------------------------------------------|
| a) View my medical records, test results, and lists of medications I am taking                                                                                            | <input type="radio"/>               | <input type="radio"/>                         | <input type="radio"/>                            |
| b) Add notes to my medical record                                                                                                                                         | <input type="radio"/>               | <input type="radio"/>                         | <input type="radio"/>                            |
| c) Request medical appointments, referrals to other doctors, and prescription refills                                                                                     | <input type="radio"/>               | <input type="radio"/>                         | <input type="radio"/>                            |
| d) Communicate with my doctor and/or receive reports from my doctor by e-mail                                                                                             | <input type="radio"/>               | <input type="radio"/>                         | <input type="radio"/>                            |
| e) Find a physician who accepts my insurance, file insurance claims, and fill out paperwork before and after a physician visit                                            | <input type="radio"/>               | <input type="radio"/>                         | <input type="radio"/>                            |
| f) Sign up for reminders for preventative health services (such as the flu shot or cholesterol testing)                                                                   | <input type="radio"/>               | <input type="radio"/>                         | <input type="radio"/>                            |
| g) Learn about opportunities to participate in medical research                                                                                                           | <input type="radio"/>               | <input type="radio"/>                         | <input type="radio"/>                            |
| h) Access my child's or parent's medical records if I am their primary caretaker                                                                                          | <input type="radio"/>               | <input type="radio"/>                         | <input type="radio"/>                            |
| i) Communicate with other people with similar health problems (examples: support groups, discussion forums, etc)                                                          | <input type="radio"/>               | <input type="radio"/>                         | <input type="radio"/>                            |
| j) Receive educational materials related to my health                                                                                                                     | <input type="radio"/>               | <input type="radio"/>                         | <input type="radio"/>                            |
| k) Record my selection of a family member or friend to manage my healthcare when I am not able to and record my treatment preferences (example: Do Not Resuscitate order) | <input type="radio"/>               | <input type="radio"/>                         | <input type="radio"/>                            |

18) How often do you think you would use a patient portal to view your health information and manage your health care (for example, take care of appointments and insurance issues and communicate with your doctors) on the Internet?

|                       |                       |                       |                          |                       |
|-----------------------|-----------------------|-----------------------|--------------------------|-----------------------|
| <input type="radio"/> | <input type="radio"/> | <input type="radio"/> | <input type="radio"/>    | <input type="radio"/> |
| About once daily      | Once weekly           | Once monthly          | Once every 3 to 6 months | Rarely or not at all  |

19) How do you think using a patient portal to view your health information and manage your health care on the Internet will affect the following:

|                                                       | Greatly<br>improve    | Slightly<br>improve   | No<br>effect          | Slightly<br>worsen    | Greatly<br>worsen     |
|-------------------------------------------------------|-----------------------|-----------------------|-----------------------|-----------------------|-----------------------|
| a) The security and privacy of my medical information | <input type="radio"/> |
| b) Communication between my doctors and myself        | <input type="radio"/> |
| c) My understanding of my own health                  | <input type="radio"/> |
| d) My sense of control over my own healthcare         | <input type="radio"/> |
| e) My worries about my own healthcare                 | <input type="radio"/> |
| f) The safety of my care (freedom from errors)        | <input type="radio"/> |
| g) My satisfaction with my healthcare                 | <input type="radio"/> |
| h) The overall quality of my healthcare               | <input type="radio"/> |
| i) The overall costs of my healthcare                 | <input type="radio"/> |

20) How difficult or easy do you think it would be for you to use a patient portal to view your health information and manage your health care on the Internet?

- ☐ Very difficult      ☐ Difficult      ☐ Somewhat difficult      ☐ Easy      ☐ Very easy

21) Who would you give permission to view information in your patient portal? Please check all that apply:

- ☐ Designated family members/friends  
☐ My primary care doctor  
☐ Other doctors or healthcare providers who care for me (in clinic, the ER, or the hospital)  
☐ My health plan  
☐ My employer  
☐ Government officials  
☐ I would not give anyone permission

**Questions 22-34:** The following questions are to help us understand who is responding to this survey. This information will not be used to identify you individually.

22) How old are you? \_\_\_\_\_

23) Are you male or female?

- ☐ Male  
☐ Female

24) Indicate which country you are born in? \_\_\_\_\_

25) Indicate which country your mother was born in? \_\_\_\_\_

26) Indicate which country your father was born in? \_\_\_\_\_

27) What is the primary language spoken in your home?

- ☐ Dutch  
☐ French  
☐ German  
☐ Other – Please state: \_\_\_\_\_

28) What is the highest grade or level of school you have completed?

- ☐ Primary school  
☐ High school  
☐ Bachelor degree  
☐ Master degree or higher

29) What is your employment status?

- ☐ Employed full or part time  
☐ Self-employed  
☐ Full time student  
☐ Homemaker  
☐ Disabled and not working  
☐ Currently unemployed, not disabled  
☐ Retired

30) Which describes the best estimate of your annual household income before taxes?

- ☐ Under 20,000 €  
☐ 20,000-30,000 €  
☐ 30,000-40,000 €  
☐ 40,000-60,000 €  
☐ 60,000-80,000 €  
☐ More than 80,000 €  
☐ I don't know  
☐ I don't wish to answer this question

31) How many people, including yourself, live in your household? \_\_\_\_\_

32) How many children aged 18 or under live with you? \_\_\_\_\_

33) What is your current zip code? \_\_\_\_ \_

34) What is the best description of your current living situation

☐ Urban

☐ Rural

## Part 2 of the survey:

**Questions 1-5:** These questions ask how you value matters related to health.

1) Indicate how important each of the following things is to you:

|                                                                     | Very important | Important | Not really important | Unimportant | Very unimportant |
|---------------------------------------------------------------------|----------------|-----------|----------------------|-------------|------------------|
| Being aware of all the details about your health                    |                |           |                      |             |                  |
| Understand exactly what the cause is of the symptoms you experience |                |           |                      |             |                  |
| Knowing whether you are healthy or not                              |                |           |                      |             |                  |

2) Indicate how important each of the following things is to you:

*This question is only for participants who get treated for an acute, prolonged, or chronic condition such as high blood pressure, diabetes, heart and lung disease, mental problems, or arthritis.*

|                                                                             | Very important | Important | Not really important | Unimportant | Very unimportant |
|-----------------------------------------------------------------------------|----------------|-----------|----------------------|-------------|------------------|
| Knowing exactly the nature of your condition                                |                |           |                      |             |                  |
| Knowing exactly your prognosis                                              |                |           |                      |             |                  |
| Knowing exactly how your condition will evolve                              |                |           |                      |             |                  |
| That people in your environment believe you are not imagining your symptoms |                |           |                      |             |                  |
| Knowing the current and exact state of your condition                       |                |           |                      |             |                  |

3) How worried are you that you are not completely informed of all things related to your health?

☐ Very worried     
 ☐ Worried     
 ☐ Not very worried     
 ☐ Not worried     
 ☐ Not worried at all

4) How interesting is it to understand exactly how your body works exactly?

☐ Very interesting     
 ☐ Interesting     
 ☐ Not very interesting     
 ☐ Uninteresting     
 ☐ Very uninteresting

5) Indicate how strongly you agree or disagree with each of the following statements:

|                                                                                                      | Strongly agree | Agree | Neutral | Disagree | Strongly disagree |
|------------------------------------------------------------------------------------------------------|----------------|-------|---------|----------|-------------------|
| Sometimes, I wonder how common the symptoms are I experience.                                        |                |       |         |          |                   |
| Sometimes, I wonder whether my symptoms are severe enough to take action                             |                |       |         |          |                   |
| Sometimes, I wonder whether there are symptoms I should watch out for, so I can take actions in time |                |       |         |          |                   |

**Questions 6-8:** These questions ask about your health literacy.

6) Indicate how difficult or easy the following things is to you:

|                                                                     | Very difficult | Difficult | Somewhat difficult | Easy | Very easy |
|---------------------------------------------------------------------|----------------|-----------|--------------------|------|-----------|
| Find information that is relevant to your personal health situation |                |           |                    |      |           |
| Assess the reliability of the health information you find yourself  |                |           |                    |      |           |

7) How often do you have problems understanding the health information you find yourself?

☐ Always     
 ☐ Often     
 ☐ Sometimes     
 ☐ Occasionally     
 ☐ Never

8) Indicate how strongly you agree or disagree with each of the following statements:

|                                                                                                    | Strongly agree | Agree | Neutral | Disagree | Strongly disagree |
|----------------------------------------------------------------------------------------------------|----------------|-------|---------|----------|-------------------|
| The health information I can find is often too general and does not apply to my personal situation |                |       |         |          |                   |
| I have ever been disappointed in the results of tests or treatments                                |                |       |         |          |                   |

**Questions 9-11:** These questions ask how you deal with your condition.

*Questions 9–11 are only for participants who get treated for an acute, prolonged, or chronic condition such as high blood pressure, diabetes, heart and lung disease, mental problems, or arthritis.*

9) Indicate how strongly you agree or disagree with each of the following statements:

|                                                                                                                 | Strongly agree | Agree | Neutral | Disagree | Strongly disagree |
|-----------------------------------------------------------------------------------------------------------------|----------------|-------|---------|----------|-------------------|
| I do everything possible to prevent me from crossing my borders                                                 |                |       |         |          |                   |
| Sometimes, I do something while I know in advance that I will need to recover from it for a few days            |                |       |         |          |                   |
| Sometimes, I decide not to do something because I know in advance I will need to recover from it for a few days |                |       |         |          |                   |
| I do everything to prevent my symptoms to get worse                                                             |                |       |         |          |                   |

10) How important is it for you to be able to form realistic expectations about the evolution of your condition?

☐ Very important
 ☐ Important
 ☐ Not really important
 ☐ Unimportant
 ☐ Very unimportant

11) How difficult is it for you to deal with the emotional effects of your condition?

☐ Very difficult

☐ Difficult

☐ Somewhat difficult

☐ Easy

☐ Very easy

**Questions 12-13:** These questions ask how you value effective care.

12) Indicate how important each of the following things is to you:

|                                                                                      | Very important | Important | Not really important | Unimportant | Very unimportant |
|--------------------------------------------------------------------------------------|----------------|-----------|----------------------|-------------|------------------|
| Knowing exactly what the risks are before you undergoing a treatment                 |                |           |                      |             |                  |
| Knowing exactly what the possible side effects are before you undergoing a treatment |                |           |                      |             |                  |
| Knowing exactly what the expected effects are before you undergoing a treatment      |                |           |                      |             |                  |
| Knowing exactly what the chances of success are before you undergoing a treatment    |                |           |                      |             |                  |
| Knowing exactly which complications may occur before you undergoing a treatment      |                |           |                      |             |                  |
| Understanding exactly why the treatment is necessary before undergoing it            |                |           |                      |             |                  |
| Knowing exactly what the risks are before you undergoing a treatment                 |                |           |                      |             |                  |
| Knowing in detail what will happen in your body before                               |                |           |                      |             |                  |

|                                                                                      |  |  |  |  |  |
|--------------------------------------------------------------------------------------|--|--|--|--|--|
| undergoing a treatment                                                               |  |  |  |  |  |
| Understanding exactly what treatment is most appropriate for your personal situation |  |  |  |  |  |

13) Indicate how strongly you agree or disagree with each of the following statement: I do everything to undergo as few treatments as possible.

☐ Strongly agree
 ☐ Agree
 ☐ Neutral
 ☐ Disagree
 ☐ Strongly disagree

**Questions 14-15:** These questions ask about your wishes regarding the relationship with your doctors.

14) Indicate how strongly you agree or disagree with each of the following statement: It is important to me that my doctor and I make decisions about my medical care together, and not the doctor on their own.

☐ Strongly agree
 ☐ Agree
 ☐ Neutral
 ☐ Disagree
 ☐ Strongly disagree

15) How important is it for you, in your relationship with your doctor, that you can question their decisions?

☐ Very important
 ☐ Important
 ☐ Not really important
 ☐ Unimportant
 ☐ Very unimportant

**Questions 16-18:** These questions ask how you value good health.

16) Indicate how strongly you agree or disagree with each of the following statement: I do everything to attain or good health or maintain it.

☐ Strongly agree
 ☐ Agree
 ☐ Neutral
 ☐ Disagree
 ☐ Strongly disagree

17) How worried are you that there are factors that influence your health without realizing them?

☐ Very worried
 ☐ Worried
 ☐ Not very worried
 ☐ Not worried
 ☐ Not worried at all

18) Indicate how important each of the following things is to you:

|                                                                             | Very important | Important | Not really important | Unimportant | Very unimportant |
|-----------------------------------------------------------------------------|----------------|-----------|----------------------|-------------|------------------|
| Understanding exactly what impact your diet has on your health              |                |           |                      |             |                  |
| Understanding exactly what impact your physical activity has on your health |                |           |                      |             |                  |
| Understanding exactly what impact                                           |                |           |                      |             |                  |

|                                           |  |  |  |  |  |
|-------------------------------------------|--|--|--|--|--|
| environmental factors have on your health |  |  |  |  |  |
|-------------------------------------------|--|--|--|--|--|

**Questions 19-20:** These questions ask how you value patient rights.

19) Indicate how worried you are for each of the following statements:

|                                                 | Very worried | Worried | Not very worried | Not worried | Not worried at all |
|-------------------------------------------------|--------------|---------|------------------|-------------|--------------------|
| That your rights as a patient are violated      |              |         |                  |             |                    |
| That you are treated differently than others    |              |         |                  |             |                    |
| About your future social and financial security |              |         |                  |             |                    |

20) Indicate how strongly you agree or disagree with each of the following statements:

|                                                         | Strongly agree | Agree | Neutral | Disagree | Strongly disagree |
|---------------------------------------------------------|----------------|-------|---------|----------|-------------------|
| I know exactly which reimbursements I am entitled to    |                |       |         |          |                   |
| I know exactly which support I am entitled to           |                |       |         |          |                   |
| My future social and financial security are clear to me |                |       |         |          |                   |

**Questions 21-22:** These questions ask to what extent you feel recognized regarding your health.

21) Indicate how strongly you agree or disagree with each of the following statements:

|                                                                              | Strongly agree | Agree | Neutral | Disagree | Strongly disagree |
|------------------------------------------------------------------------------|----------------|-------|---------|----------|-------------------|
| I do not always feel taken seriously by my doctors                           |                |       |         |          |                   |
| I do not always feel taken seriously regarding my health by people around me |                |       |         |          |                   |

22) How important is it for you that people around you understand how it is to live with your condition?

☐ Very important     
 ☐ Important     
 ☐ Not really important     
 ☐ Unimportant     
 ☐ Very unimportant

**Questions 23-25:** These questions ask how you value insight in your medical history.

23) Indicate how important each of the following things is to you:

|                                                                                   | Very important | Important | Not really important | Unimportant | Very unimportant |
|-----------------------------------------------------------------------------------|----------------|-----------|----------------------|-------------|------------------|
| Knowing exactly what complications occurred after a surgery, injury, or treatment |                |           |                      |             |                  |
| Knowing exactly what the effects will be after a surgery, injury, or treatment    |                |           |                      |             |                  |

24) How difficult is it for you to keep an overview on the appointments, treatments, and surgeries you had in the past?

☐ Very difficult     
 ☐ Difficult     
 ☐ Somewhat difficult     
 ☐ Easy     
 ☐ Very easy

25) Indicate how strongly you agree or disagree with each of the following statement: Sometimes, I wonder whether test results are correct.

☐ Strongly agree     
 ☐ Agree     
 ☐ Neutral     
 ☐ Disagree     
 ☐ Strongly disagree

**Questions 26-29:** These questions ask about your current experiences with healthcare.

26) Indicate how strongly you agree or disagree with each of the following statements:

|                                                                                                      | Strongly agree | Agree | Neutral | Disagree | Strongly disagree |
|------------------------------------------------------------------------------------------------------|----------------|-------|---------|----------|-------------------|
| Sometimes, I have the impression that my doctors do not tell me everything they know about my health |                |       |         |          |                   |
| My doctors do not always explain their decisions well enough                                         |                |       |         |          |                   |
| Sometimes, I have the impression that my doctors do                                                  |                |       |         |          |                   |

|                                                                                                                 |  |  |  |  |  |
|-----------------------------------------------------------------------------------------------------------------|--|--|--|--|--|
| not look at the overall picture of my health, but reason too much from their own specialism                     |  |  |  |  |  |
| It happens that my doctors are not well aware of my situation, so I have to repeat my story over and over again |  |  |  |  |  |
| Before I visit my doctor, I try to find relevant information to be well prepared                                |  |  |  |  |  |
| It happens that after my visit to my doctor, I notice that I did not ask every questions I had                  |  |  |  |  |  |
| From time to time, I track some health information (e.g. a pain, sleep, or diet diary, my weight, sports, ...)  |  |  |  |  |  |

27) Indicate how important each of the following things is to you:

|                                                                                                                     | Very important | Important | Not really important | Unimportant | Very unimportant |
|---------------------------------------------------------------------------------------------------------------------|----------------|-----------|----------------------|-------------|------------------|
| Being well prepared before visiting a doctor                                                                        |                |           |                      |             |                  |
| After a visit to your doctor, seek additional information or evidence about what your doctor has discussed with you |                |           |                      |             |                  |
| Receive the information that your doctors give you in a tangible way (not only verbally)                            |                |           |                      |             |                  |

28) How often do you have problems remembering details of what your doctor discussed with you about your health?

☐ Always

☐ Often

☐ Sometimes

☐ Occasionally

☐ Never

29) Indicate how difficult or easy the following things is to you:

|                                                                                                                           | Very difficult | Difficult | Somewhat difficult | Easy | Very easy |
|---------------------------------------------------------------------------------------------------------------------------|----------------|-----------|--------------------|------|-----------|
| After you have visited your doctor, seek additional information or evidence about what your doctor has discussed with you |                |           |                    |      |           |
| Manage administrative things about your health (e.g. appointments with doctors or other healthcare providers).            |                |           |                    |      |           |

**Questions 30-34:** These questions ask about your experiences with a patient portal.

30) Indicate how strongly you agree or disagree with each of the following statements:

|                                                                                                            | Strongly agree | Agree | Neutral | Disagree | Strongly disagree |
|------------------------------------------------------------------------------------------------------------|----------------|-------|---------|----------|-------------------|
| I have ever wondered what information was in my patient portal                                             |                |       |         |          |                   |
| I have ever had the impression that the content of my patient portal is not correct                        |                |       |         |          |                   |
| I have ever had the impression that there was information in my patient portal of which I was not aware of |                |       |         |          |                   |
| It is clear to me who has access to the data in my patient portal                                          |                |       |         |          |                   |
| It is clear to me what happens                                                                             |                |       |         |          |                   |

|                                                                                                                                                                                      |  |  |  |  |  |
|--------------------------------------------------------------------------------------------------------------------------------------------------------------------------------------|--|--|--|--|--|
| with the data in my patient portal                                                                                                                                                   |  |  |  |  |  |
| If I were asked, I would agree that the (anonymized) data in my patient portal could be used for research by scientific institutions such as universities                            |  |  |  |  |  |
| If I were asked, I would agree that the (anonymized) data in my patient portal could be used for research by commercial institutions (e.g. pharmaceutical companies, insurers, etc.) |  |  |  |  |  |

31) Indicate how worried you are for each of the following statements:

|                                                                                                                        | Very worried | Worried | Not very worried | Not worried | Not worried at all |
|------------------------------------------------------------------------------------------------------------------------|--------------|---------|------------------|-------------|--------------------|
| That there are people who have access to the data in my patient portal, whom I prefer they would not have access to it |              |         |                  |             |                    |
| That the data in my patient portal can be used and distributed without permission                                      |              |         |                  |             |                    |
| That the data in my patient portal can be used for commercial benefit                                                  |              |         |                  |             |                    |
| That my insurance / mutuality would treat me differently if they had access to the data in my patient portal           |              |         |                  |             |                    |
| That my insurance /                                                                                                    |              |         |                  |             |                    |

|                                                                                                      |  |  |  |  |  |
|------------------------------------------------------------------------------------------------------|--|--|--|--|--|
| mutuality would exclude me from insurance if they would have access to the data in my patient portal |  |  |  |  |  |
|------------------------------------------------------------------------------------------------------|--|--|--|--|--|

32) Have you ever asked for access to your patient portal through a doctor or other healthcare provider?

☐  
Yes

☐  
No

☐  
I don't know

*Question 33 is only for participants who answered 'Yes' to question 32.*

33) Indicate how strongly you agree or disagree with each of the following statement: It was easy to get access to my patient portal.

☐  
Strongly agree

☐  
Agree

☐  
Neutral

☐  
Disagree

☐  
Strongly disagree

34) How important is it for you that you can decide who gets access to the data in your patient portal?

☐  
Very important

☐  
Important

☐  
Not really important

☐  
Unimportant

☐  
Very unimportant

**Questions 35-37:** These questions ask about your wishes in case you could easily access all the data in your patient portal

35) Indicate how important each of the following things is to you, if you could have access to all the data in your patient portal:

|                                                                                                    | Very important | Important | Not really important | Unimportant | Very unimportant |
|----------------------------------------------------------------------------------------------------|----------------|-----------|----------------------|-------------|------------------|
| Compare recent personal data with personal data from the past                                      |                |           |                      |             |                  |
| Compare your personal data with (medical) standards                                                |                |           |                      |             |                  |
| Compare your data with the (anonymized) data of other patients                                     |                |           |                      |             |                  |
| Compare your data with the (anonymized) data of the Flemish population                             |                |           |                      |             |                  |
| Check for relationships between your symptoms, your condition(s), your biological parameters, etc. |                |           |                      |             |                  |
| Check for relationships                                                                            |                |           |                      |             |                  |

|                                                                                        |  |  |  |  |  |
|----------------------------------------------------------------------------------------|--|--|--|--|--|
| between your health and the presence of certain environmental factors                  |  |  |  |  |  |
| Check the evolution of your health over time                                           |  |  |  |  |  |
| Check information about the expected effect of treatments on your health               |  |  |  |  |  |
| Check information about the expected impact of your lifestyle on your health           |  |  |  |  |  |
| Make your (anonymized) data available so that regional or rural issues can be detected |  |  |  |  |  |
| Being notified when certain physical parameters evolve towards dangerous levels        |  |  |  |  |  |
| Being notified when your health situation changes                                      |  |  |  |  |  |

36) If you had access to all the data in your patient portal, how difficult or easy do you think it would be to compare your data to the (anonymized) data from others?

☐ Very difficult

☐ Difficult

☐ Somewhat difficult

☐ Easy

☐ Very easy

37) Indicate how strongly you agree or disagree with each of the following statements:

|                                                                                                                                                                  | Strongly agree | Agree | Neutral | Disagree | Strongly disagree |
|------------------------------------------------------------------------------------------------------------------------------------------------------------------|----------------|-------|---------|----------|-------------------|
| If I could compare the data in my patient portal with the (anonymized) data from others on my own, I would probably make mistakes that lead to false conclusions |                |       |         |          |                   |
| If I would have access to all data in my patient portal, I would probably have unnecessary worries                                                               |                |       |         |          |                   |
